# Supplementary material
Source: publisher figshare collection journal article supplement (https://karger.figshare.com/ndownloader/files/13787132)
Supplement: Supplementary file 1 [file 13787132]

Video 1. ■■■.Video depicting the surgical removal of the intra-ocular ointment. An anterior chamber maintainer connected to a BSS bottle was placed through a side port. A clear corneal tunnel was created near the limbus superiorly, and the ointment was actively aspirated using a blunt cannula.
